# Supplementary material for: Measuring Global Poverty: Why PPP Methods Matter
Source: Oxford University Press journal article supplement (doi:10.1162/rest_a_00294), 2012-07-18
Supplement: rest_a_00294_esupp.pdf [file rest_a_00294_esupp.pdf]

# Data Annex for “Measuring Global Poverty: Why PPP Methods Matter”

Robert Ackland\*

Steve Dowrick†

Benoit Freyens‡

April 13, 2012

## A.1 1996 data and country-level poverty estimates

### A.1.1 ICP income data

The 1996 ICP data cover 115 countries and can be accessed at <http://pwt.econ.upenn.edu/Downloads/benchmark/benchmark.html>.

We detected some irregularities in the ICP data, namely zero or negative PPPs for some countries, which would prevent the calculation of real quantities. As documented below, adjustments were made to the ICP PPPs to correct for these problems. Any adjustment to a PPP was matched by an adjustment to the corresponding ICP quantities to ensure that expenditure for the item was unchanged (except when the ICP quantity was zero).

#### Consumption PPPs

1. Negative PPPs were found for the item “Restaurants, Cafes and Hotels” for Egypt and Morocco. We assigned a positive sign to the original ICP PPPs (implicitly assuming the negative sign was an error). In general, the item “Restaurants, Cafes and Hotels” displays a peculiar pattern. All Caribbean countries have PPPs for this item that are close to zero, yielding extravagantly high real quantities. The same problem is found for some Middle East, African and Former Soviet Union countries (albeit, to a lesser extent). We decided to proxy this irregular data with the PPP for the item “Other Goods and Services” and readjust raw quantities.

2. PPPs for the item “Alcoholic beverages” were zero for the following 10 countries: Egypt, Lebanon, Yemen, Syria, Qatar, Jordan, Oman, Pakistan, Bahrain, Iran. These zero PPPs were replaced by the PPPs for the item “Other Food”, which was deemed to be more consistent with “Alcoholic beverages” than “Non-Alcoholic Beverages”. The same 10 countries also exhibit infinitesimally small quantity data for this item. Although one would expect low numbers for such countries, the close proximity of the quantities to zero was deemed suspicious. The quantity data was thus set to zero for these 10 countries.

---

\*Corresponding Author. Australian Demographic and Social Research Institute, Australian National University. Postal address: Coombs Building (no. 9), The Australian National University, ACT 0200, AUSTRALIA. TEL: +61 02 6125 0312; FAX: +61 02 6125 2992, [robert.ackland@anu.edu.au](mailto:robert.ackland@anu.edu.au)

†School of Economics, Australian National University, [steve.dowrick@anu.edu.au](mailto:steve.dowrick@anu.edu.au)

‡Economics, Faculty of Business, Government & Law, University of Canberra and Centre of Law & Economics, Australian National University, [ben.freyens@canberra.edu.au](mailto:ben.freyens@canberra.edu.au)

3. PPPs for the item “Communication” were zero for the following 4 countries: Antigua & Barbuda, Grenada, St. Kitts & Nevis, St. Vincent & Grenadines. Since the ratio of the PPP for “Communication” to the nominal GDP PPP is approximately equal to 1 for most countries, we used nominal GDP PPP as a proxy for this item. Since the ICP quantity for this item for these countries was already zero, no corresponding quantity adjustment was made.

4. PPPs for the items “Personal Transport”, “Operation of Transportation Equipment” and “Machinery and Equipment” were zero for Mongolia. They were replaced by the PPPs for the items “Purchased Transport Services” and “Construction”, respectively. Since raw quantities were also zero, no corresponding quantity adjustment was made.

### **Investment PPPs**

PPPs for position “Changes in Stocks” were zero for the following 6 countries: Cameroon, Gabon, Madagascar, Mali, Senegal, Sierra Leone. They were replaced by the PPPs for the item “Machinery and Equipment”. Since raw quantities were also zero, no quantity adjustment was made.

### **Nominal GDP Expenditures**

It is recognised that the quantities for some GDP expenditure items such as “Net Foreign Balance” often take a negative value.<sup>1</sup> This poses a problem for the calculation of Geary-Khamis index numbers; since the GK system of equations assumes positive quantities, the solution of the system can only be computed over the positive orthant. Another problem is that we cannot take the log of negative expenditure data. We resolve this issue by removing the “Net Foreign Balance” data and apportioning the NFB quantity data over the other expenditures categories of GDP using relative budget share of other expenditure items as a weight (i.e. adjusting all other expenditure categories so that GDP remains the same).

### **GK and EKS real income**

The 1996 GK and EKS real income estimates are shown in Table A1. Note that for India and China GK and EKS real income has been imputed using an approach detailed in the paper.

## **A.1.2 Income distribution and other data**

The income distribution data used for 1996 in Table A1 is from the Deininger-Squire 1996 (DS) income inequality database<sup>2</sup>, updated where possible by the income quintiles published by the World Bank in the World Development Indicators 2003 (WDI)<sup>3</sup>. Since the reference year for this part of our study is 1996 (the year of the penultimate ICP round), the quintile data was selected to be as close to 1996 as possible. For instance, for Bulgaria, the 1993 DS data was preferred to the 2001 WDI data. Starting from the original 115 ICP countries plus India and China; 14 countries (Congo, Antigua & Barbuda, Belize, Bermuda, Dominica, Grenada, St. Kitts & Nevis, St. Vincent & Grenadines, Bahrain, Oman, Qatar, Syria, Iceland and Albania) had to be dropped out of the analysis because no quintile information was provided in either data set.

---

<sup>1</sup>Handbook of the International Comparison Program, Annex II: Methods of Aggregation, United Nations, 2003. [http://unstats.un.org/unsd/methods/icp/ipc7\\\_htm.htm](http://unstats.un.org/unsd/methods/icp/ipc7\_htm.htm)

<sup>2</sup>Deininger, K. and L. Squire (1996), “A New Data Set Measuring Income Inequality,” *World Bank Economic Review*, 10(3), pp. 565-91.

<sup>3</sup>World Bank (2003), *World Development Indicators (WDI): 2003*, CD-ROM.

Six more countries (Benin, Gabon, Fiji, Barbados, Argentina and Lebanon) were dropped as their quintile information was considered either too old (Gabon 1977, Barbados 1979) to be a reasonable proxy for 1996 distribution or because the data was marked as unreliable in the DS database (Argentina: estimate based on surveys of less than full national coverage, Benin, Fiji and Lebanon: unclear sources) or both.

The poverty analysis for 1996 was therefore conducted on a reduced set of 97 countries. The WDI data usually provides a better 1996 proxy for most of the 97 countries. The countries not covered by WDI data (and hence covered by DS data instead) are: Mauritius, Tanzania, Bahamas, Bulgaria, Moldova, Estonia, Lithuania, Georgia, Kazakhstan and the Kyrgyz Republic. Finally, for Estonia, Mauritius and Tanzania, the quintile data is for expenditure rather than income.

### **A.1.3 Country-level poverty estimates**

The 1996 country-level poverty estimates are shown in Table A2.

## **A.2 2005 data and country-level poverty estimates**

### **A.2.1 Income data**

The 2005 ICP data cover 146 countries and can be accessed from the World Databank, a web resource of the World Bank (<http://databank.worldbank.org/ddp/home.do>). The data are for 129 categories of goods and services, but we used the Geary-Khamis approach to aggregate to 37 categories in order to facilitate comparison with the 1996 ICP data (which are for 31 items). Unlike the 1996 ICP data, we did not have to perform any data cleaning for the 2005 data.

#### **GK and EKS real income**

The 2005 GK and EKS real income estimates are shown in Table A3.

### **A.2.2 Income distribution and other data**

For the 2005 exercise, the income distribution data (Table A3) is sourced from the World Income Inequality Database (WIID) of the World Institute for Development Economics Research, UNU-WIDER (2007), 'World Income Inequality Database (WIID) V 2.0b May 2007' (<http://website1.wider.unu.edu/wiid/wiid.htm>), complemented by the income quintiles published by the World Bank through its WDI Online resource: World Development Indicators 2010 (<http://databank.worldbank.org/ddp/home.do?Step=12&id=4&CN0=2>). WIID data comes as either quintiles or deciles, and for many countries several versions of the data are available for the same year (usually reflecting different surveys from different sources). There is therefore a choice to be made about the preferred data source and specific methodologies. For developed countries, we selected income measures from comparable sources (e.g. LIS data for European countries). For developing countries, the choice was generally much more restricted and mostly confined to consumption measures. For most African and Asian countries, we used WDI rather than WIID data, as the data was more recent and stemming from similar sources (particularly for Africa). Only seldom did we use WDI quintiles for developed countries (e.g. Romania, Switzerland), generally for lack of WIID data.

Since our reference year is here 2005, the quintile data was selected to be as close to 2005 as possible. Starting from the original 146 ICP countries; 21 countries had to be dropped out of the analysis because no information was provided in either the WIID or the WDI data set. These ICP countries are: Macao, Brunei, Iceland, Malta, Cyprus, Fiji, Maldives, Mauritius, Montenegro, Equatorial Guinea, Sao Tome & Principe, Sudan, Zimbabwe, Iraq, Lebanon, Bahrain, Kuwait, Oman, Qatar, Saudi Arabia, and the Syrian Arab Republic. Since Montenegro is an ICP country, which gained its independence only very recently, its most recent distributional data (2001) is still merged with that of Serbia. Since the population of Serbia is about 6 times that of Montenegro we took those 2001 quintiles as being representative of income distribution in Serbia, not Montenegro. One more country (Namibia) was dropped as the quintile information was considered too old (1993). Other countries presented the same issue but were either considered too important to be dropped out (Japan 1993), or their quintile data was less obsolete (Singapore 1998, Hong-Kong 1996, New Zealand 1996, South Korea 1998). The poverty analysis was therefore conducted on a reduced set of 124 countries (146 ICP countries minus the 22 countries mentioned above), 119 of which had existing distribution data for 2005 or a nearby year. Overall, we sourced 70 distribution from the WDI database and 54 from the WIID database.

### **A.2.3 Country-level poverty estimates**

The 2005 country-level poverty estimates are shown in Table A4.

Table A1: Real income estimates and other data for poverty estimation – 1996

| country              | ISO | year | Q1   | Q2   | Q3   | Q4   | Q5   | XR       | pop     | region | pov | EKS   | GK    |
|----------------------|-----|------|------|------|------|------|------|----------|---------|--------|-----|-------|-------|
| Benin                | BEN | 1959 | 0.08 | 0.10 | 0.12 | 0.20 | 0.50 | 511.55   | 5629    | SSA    | 0   | 935   | 1144  |
| Botswana             | BWA | 1993 | 0.02 | 0.05 | 0.08 | 0.14 | 0.70 | 3.32     | 1496    | SSA    | 1   | 6981  | 7742  |
| Cameroon             | CMR | 1996 | 0.05 | 0.08 | 0.13 | 0.21 | 0.53 | 511.55   | 13549   | SSA    | 1   | 1771  | 2468  |
| Congo                | COG |      |      |      |      |      |      | 511.55   | 2634    | SSA    | 0   | 1304  | 1540  |
| Cote d'Ivoire        | CIV | 1995 | 0.07 | 0.11 | 0.16 | 0.22 | 0.44 | 511.55   | 13889   | SSA    | 1   | 1858  | 2499  |
| Egypt                | EGY | 1999 | 0.09 | 0.12 | 0.15 | 0.20 | 0.44 | 3.39     | 59272   | MENA   | 1   | 3474  | 4544  |
| Gabon                | GAB | 1977 | 0.03 | 0.05 | 0.10 | 0.17 | 0.66 | 511.55   | 1125    | SSA    | 0   | 6951  | 10057 |
| Guinea               | GIN | 1994 | 0.06 | 0.10 | 0.15 | 0.21 | 0.47 | 1004.02  | 6756    | SSA    | 1   | 2071  | 3089  |
| Kenya                | KEN | 1997 | 0.06 | 0.09 | 0.14 | 0.20 | 0.51 | 57.11    | 27918   | SSA    | 1   | 1139  | 1382  |
| Madagascar           | MDG | 1999 | 0.06 | 0.11 | 0.15 | 0.23 | 0.45 | 4061.25  | 13718   | SSA    | 1   | 782   | 913   |
| Malawi               | MWI | 1997 | 0.05 | 0.08 | 0.12 | 0.18 | 0.56 | 15.31    | 10016   | SSA    | 1   | 635   | 847   |
| Mali                 | MLI | 1994 | 0.05 | 0.08 | 0.12 | 0.19 | 0.56 | 511.55   | 9993    | SSA    | 1   | 740   | 962   |
| Mauritius            | MUS | 1991 | 0.07 | 0.12 | 0.16 | 0.23 | 0.43 | 17.95    | 1134    | SSA    | 1   | 10979 | 15191 |
| Morocco              | MAR | 1999 | 0.07 | 0.11 | 0.15 | 0.21 | 0.47 | 8.72     | 26848   | MENA   | 1   | 3906  | 4833  |
| Nigeria              | NGA | 1997 | 0.04 | 0.08 | 0.13 | 0.19 | 0.56 | 21.88    | 114496  | SSA    | 1   | 814   | 956   |
| Senegal              | SEN | 1995 | 0.06 | 0.10 | 0.14 | 0.21 | 0.48 | 511.55   | 8557    | SSA    | 1   | 1415  | 1754  |
| Sierra Leone         | SLE | 1989 | 0.01 | 0.02 | 0.10 | 0.24 | 0.63 | 920.73   | 4630    | SSA    | 1   | 758   | 1217  |
| Swaziland            | SWZ | 1994 | 0.03 | 0.06 | 0.10 | 0.17 | 0.64 | 4.30     | 929     | SSA    | 1   | 4479  | 5756  |
| Tanzania             | TZA | 1993 | 0.07 | 0.11 | 0.15 | 0.22 | 0.45 | 579.98   | 30488   | SSA    | 1   | 466   | 506   |
| Tunisia              | TUN | 1995 | 0.06 | 0.10 | 0.15 | 0.22 | 0.48 | 0.97     | 9089    | MENA   | 1   | 6185  | 8352  |
| Zambia               | ZMB | 1998 | 0.03 | 0.08 | 0.13 | 0.20 | 0.57 | 1207.90  | 9214    | SSA    | 1   | 834   | 924   |
| Zimbabwe             | ZWE | 1995 | 0.05 | 0.08 | 0.12 | 0.19 | 0.56 | 10.00    | 11242   | SSA    | 1   | 3062  | 3768  |
| Bangladesh           | BGD | 2000 | 0.09 | 0.13 | 0.16 | 0.21 | 0.41 | 41.79    | 121679  | SA     | 1   | 1381  | 1526  |
| China                | CHN | 1998 | 0.06 | 0.10 | 0.15 | 0.22 | 0.47 | 8.31     | 1215414 | EAP    | 1   | 2848  | 3230  |
| Fiji                 | FJI | 1968 | 0.04 | 0.08 | 0.13 | 0.22 | 0.52 | 1.40     | 776     | EAP    | 0   | 4883  | 5453  |
| Hong Kong            | HKG | 1996 | 0.05 | 0.09 | 0.14 | 0.21 | 0.51 | 7.73     | 6311    | HIC    | 1   | 26737 | 30992 |
| India                | IND | 1997 | 0.08 | 0.12 | 0.15 | 0.19 | 0.46 | 35.43    | 945612  | SA     | 1   | 2023  | 2308  |
| Indonesia            | IDN | 2000 | 0.08 | 0.12 | 0.15 | 0.21 | 0.43 | 2342.30  | 197156  | EAP    | 1   | 3668  | 4461  |
| Iran                 | IRN | 1998 | 0.05 | 0.09 | 0.14 | 0.21 | 0.50 | 1750.76  | 59925   | MENA   | 1   | 5538  | 6040  |
| Korea                | KOR | 1998 | 0.08 | 0.14 | 0.18 | 0.23 | 0.37 | 804.45   | 45545   | HIC    | 1   | 15616 | 16915 |
| Nepal                | NPL | 1996 | 0.08 | 0.12 | 0.15 | 0.21 | 0.45 | 56.69    | 21795   | SA     | 1   | 1100  | 1501  |
| Pakistan             | PAK | 1999 | 0.09 | 0.12 | 0.16 | 0.21 | 0.42 | 35.27    | 125410  | SA     | 1   | 1859  | 2021  |
| Philippines          | PHL | 2000 | 0.05 | 0.09 | 0.13 | 0.20 | 0.52 | 26.22    | 71899   | EAP    | 1   | 3551  | 3841  |
| Singapore            | SGP | 1998 | 0.05 | 0.09 | 0.15 | 0.22 | 0.49 | 1.41     | 3670    | HIC    | 1   | 27772 | 31658 |
| Sri Lanka            | LKA | 1995 | 0.08 | 0.12 | 0.16 | 0.22 | 0.43 | 55.27    | 18300   | SA     | 1   | 3039  | 3402  |
| Thailand             | THA | 2000 | 0.06 | 0.09 | 0.14 | 0.21 | 0.50 | 25.34    | 60003   | EAP    | 1   | 7144  | 8247  |
| Vietnam              | VNM | 1998 | 0.08 | 0.11 | 0.15 | 0.21 | 0.45 | 11032.60 | 74300   | EAP    | 1   | 1459  | 1734  |
| Antigua & Barbuda    | ATG |      |      |      |      |      |      | 2.70     | 67      | LAC    | 0   | 8743  | 11050 |
| Bahamas              | BHS | 1993 | 0.04 | 0.08 | 0.18 | 0.24 | 0.47 | 1.00     | 284     | LAC    | 1   | 15021 | 18515 |
| Barbados             | BRB | 1979 | 0.02 | 0.08 | 0.15 | 0.24 | 0.51 | 2.00     | 264     | LAC    | 0   | 12542 | 21798 |
| Belize               | BLZ |      |      |      |      |      |      | 2.00     | 222     | LAC    | 0   | 4816  | 5835  |
| Bermuda              | BMU |      |      |      |      |      |      | 1.00     | 62      | LAC    | 0   | 21064 | 25345 |
| Dominica             | DMA |      |      |      |      |      |      | 2.7      | 73      | LAC    | 0   | 4570  | 6595  |
| Grenada              | GRD |      |      |      |      |      |      | 2.70     | 95      | LAC    | 0   | 5148  | 6915  |
| Jamaica              | JAM | 2000 | 0.07 | 0.11 | 0.15 | 0.22 | 0.46 | 37.12    | 2538    | LAC    | 1   | 3448  | 4277  |
| St.Kitts & Nevis     | KNA |      |      |      |      |      |      | 2.70     | 41      | LAC    | 0   | 8925  | 10727 |
| St.Lucia             | LCA | 1995 | 0.05 | 0.10 | 0.15 | 0.22 | 0.48 | 2.70     | 147     | LAC    | 1   | 5283  | 6361  |
| Vincent & Grenadines | VCT |      |      |      |      |      |      | 2.70     | 112     | LAC    | 0   | 3934  | 5615  |
| Trinidad & Tobago    | TTO | 1992 | 0.06 | 0.10 | 0.16 | 0.23 | 0.46 | 6.01     | 1270    | LAC    | 1   | 7578  | 9854  |
| Argentina            | ARG | 1961 | 0.07 | 0.10 | 0.13 | 0.18 | 0.52 | 1.00     | 35220   | LAC    | 0   | 11053 | 12053 |
| Bolivia              | BOL | 1999 | 0.04 | 0.09 | 0.15 | 0.23 | 0.49 | 5.07     | 7588    | LAC    | 1   | 2399  | 2704  |
| Brazil               | BRA | 1998 | 0.02 | 0.05 | 0.10 | 0.18 | 0.64 | 1.01     | 161513  | LAC    | 1   | 7300  | 8320  |
| Chile                | CHL | 1998 | 0.03 | 0.07 | 0.11 | 0.18 | 0.61 | 412.27   | 14419   | LAC    | 1   | 8848  | 9488  |
| Ecuador              | ECU | 1995 | 0.05 | 0.09 | 0.14 | 0.21 | 0.50 | 3189.47  | 11698   | LAC    | 1   | 3341  | 3681  |
| Panama               | PAN | 1997 | 0.04 | 0.08 | 0.14 | 0.22 | 0.53 | 1.00     | 2674    | LAC    | 1   | 5799  | 6174  |
| Peru                 | PER | 1996 | 0.04 | 0.09 | 0.14 | 0.21 | 0.51 | 2.45     | 23947   | LAC    | 1   | 4859  | 5287  |
| Uruguay              | URY | 1998 | 0.04 | 0.09 | 0.14 | 0.22 | 0.50 | 7.97     | 3242    | LAC    | 1   | 8859  | 10115 |
| Venezuela            | VEN | 1998 | 0.03 | 0.08 | 0.14 | 0.22 | 0.53 | 417.33   | 22311   | LAC    | 1   | 6221  | 7467  |

Note: country - country name; ISO - ISO country code; year - year of quintile estimates; Q1-Q5 - share of income in each quintile;

XR - US exchange rate; pop - population in 1000s; region - region (SSA - Sub-Saharan Africa, EAP - East Asia & Pacific, ECA -

Eastern Europe & Central Africa, LAC - Latin America & Caribbean, MENA - Middle East & North Africa, SA - South Asia,

HIC - High-Income Countries); pov - whether poverty estimate (1=yes/2=no); EKS - EKS index; GK - GK index.

Table A1: Real income estimates and other data for poverty estimation – 1996

| country      | ISO | year | Q1   | Q2   | Q3   | Q4   | Q5   | XR       | pop    | region | pov | EKS   | GK    |
|--------------|-----|------|------|------|------|------|------|----------|--------|--------|-----|-------|-------|
| Bahrain      | BHR |      |      |      |      |      |      | 0.38     | 599    | MENA   | 0   | 10387 | 12902 |
| Jordan       | JOR | 1997 | 0.08 | 0.11 | 0.15 | 0.21 | 0.44 | 0.71     | 4314   | MENA   | 1   | 2773  | 3595  |
| Lebanon      | LBN | 1960 | 0.03 | 0.04 | 0.16 | 0.16 | 0.61 | 1571.44  | 4077   | MENA   | 0   | 3420  | 5188  |
| Oman         | OMN |      |      |      |      |      |      | 0.38     | 2173   | MENA   | 0   | 10168 | 14495 |
| Qatar        | QAT |      |      |      |      |      |      | 3.64     | 693    | MENA   | 0   | 16141 | 20382 |
| Syria        | SYR |      |      |      |      |      |      | 11.23    | 14506  | MENA   | 0   | 2803  | 3501  |
| Yemen        | YEM | 1998 | 0.07 | 0.12 | 0.17 | 0.23 | 0.41 | 94.16    | 15692  | MENA   | 1   | 580   | 860   |
| Austria      | AUT | 1995 | 0.07 | 0.13 | 0.18 | 0.24 | 0.38 | 10.59    | 8059   | HIC    | 1   | 23786 | 23833 |
| Belgium      | BEL | 1996 | 0.08 | 0.14 | 0.18 | 0.23 | 0.37 | 30.96    | 10155  | HIC    | 1   | 23587 | 23761 |
| Denmark      | DNK | 1997 | 0.08 | 0.15 | 0.18 | 0.23 | 0.36 | 5.80     | 5256   | HIC    | 1   | 26330 | 26619 |
| France       | FRA | 1995 | 0.07 | 0.13 | 0.17 | 0.23 | 0.40 | 5.12     | 59533  | HIC    | 1   | 21626 | 21949 |
| Finland      | FIN | 1995 | 0.10 | 0.15 | 0.18 | 0.22 | 0.35 | 4.59     | 5125   | HIC    | 1   | 20414 | 20507 |
| Germany      | GER | 1998 | 0.06 | 0.10 | 0.16 | 0.23 | 0.45 | 1.50     | 81896  | HIC    | 1   | 22598 | 22897 |
| Greece       | GRC | 1998 | 0.07 | 0.11 | 0.16 | 0.22 | 0.44 | 240.71   | 10476  | HIC    | 1   | 14166 | 14519 |
| Ireland      | IRL | 1987 | 0.07 | 0.12 | 0.16 | 0.22 | 0.43 | 0.63     | 3626   | HIC    | 1   | 20158 | 20392 |
| Italy        | ITA | 1998 | 0.06 | 0.12 | 0.17 | 0.23 | 0.43 | 1542.95  | 57397  | HIC    | 1   | 22243 | 22907 |
| Luxembourg   | LUX | 1998 | 0.08 | 0.13 | 0.17 | 0.23 | 0.40 | 30.96    | 418    | HIC    | 1   | 35924 | 36499 |
| Netherlands  | NLD | 1994 | 0.07 | 0.13 | 0.17 | 0.23 | 0.40 | 1.69     | 15526  | HIC    | 1   | 22568 | 22685 |
| Portugal     | PRT | 1997 | 0.06 | 0.11 | 0.15 | 0.22 | 0.46 | 154.24   | 9927   | HIC    | 1   | 14450 | 14640 |
| Spain        | ESP | 1990 | 0.08 | 0.13 | 0.17 | 0.23 | 0.40 | 126.66   | 39279  | HIC    | 1   | 16531 | 16970 |
| Sweden       | SWE | 1995 | 0.09 | 0.14 | 0.18 | 0.23 | 0.35 | 6.71     | 8841   | HIC    | 1   | 20871 | 21039 |
| UK           | GBR | 1991 | 0.06 | 0.12 | 0.16 | 0.23 | 0.43 | 0.64     | 58807  | HIC    | 1   | 20915 | 20964 |
| Iceland      | ISL |      |      |      |      |      |      | 66.50    | 269    | HIC    | 0   | 25068 | 25409 |
| Norway       | NOR | 1995 | 0.10 | 0.14 | 0.18 | 0.22 | 0.36 | 6.45     | 4381   | HIC    | 1   | 27536 | 27891 |
| Poland       | POL | 1998 | 0.08 | 0.13 | 0.17 | 0.23 | 0.40 | 2.70     | 38618  | ECA    | 1   | 7411  | 8245  |
| Switzerland  | CHE | 1992 | 0.07 | 0.13 | 0.17 | 0.23 | 0.40 | 1.24     | 7072   | HIC    | 1   | 26659 | 27356 |
| Czech Rep    | CZE | 1996 | 0.10 | 0.14 | 0.18 | 0.22 | 0.36 | 27.14    | 10315  | ECA    | 1   | 13260 | 14128 |
| Hungary      | HUN | 1998 | 0.10 | 0.15 | 0.18 | 0.23 | 0.34 | 152.65   | 10193  | ECA    | 1   | 9877  | 10778 |
| Turkey       | TUR | 2000 | 0.06 | 0.11 | 0.15 | 0.22 | 0.47 | 81404.90 | 62695  | ECA    | 1   | 6442  | 6838  |
| Australia    | AUS | 1994 | 0.06 | 0.12 | 0.17 | 0.24 | 0.41 | 1.28     | 18311  | HIC    | 1   | 23401 | 23348 |
| New Zealand  | NZL | 1997 | 0.06 | 0.11 | 0.16 | 0.23 | 0.44 | 1.45     | 3714   | HIC    | 1   | 18251 | 18078 |
| Japan        | JPN | 1993 | 0.11 | 0.14 | 0.18 | 0.22 | 0.36 | 108.78   | 125864 | HIC    | 1   | 25806 | 26709 |
| Canada       | CAN | 1997 | 0.07 | 0.13 | 0.17 | 0.23 | 0.39 | 1.36     | 29672  | HIC    | 1   | 23507 | 24061 |
| Mexico       | MEX | 1998 | 0.03 | 0.07 | 0.12 | 0.19 | 0.58 | 7.60     | 92450  | LAC    | 1   | 7640  | 8020  |
| USA          | USA | 1997 | 0.05 | 0.10 | 0.16 | 0.22 | 0.46 | 1.00     | 265504 | HIC    | 1   | 29193 | 29193 |
| Israel       | ISR | 1997 | 0.07 | 0.11 | 0.16 | 0.23 | 0.44 | 3.19     | 5692   | HIC    | 1   | 17926 | 18241 |
| Slovak Rep.  | SVK | 1996 | 0.09 | 0.15 | 0.19 | 0.23 | 0.35 | 30.65    | 5374   | ECA    | 1   | 9307  | 10109 |
| Russian Fed  | RUS | 2000 | 0.05 | 0.09 | 0.14 | 0.20 | 0.51 | 5.12     | 147739 | ECA    | 1   | 6669  | 7729  |
| Romania      | ROM | 2000 | 0.08 | 0.13 | 0.17 | 0.23 | 0.38 | 3084.22  | 22608  | ECA    | 1   | 5856  | 6572  |
| Belarus      | BLR | 2000 | 0.08 | 0.13 | 0.17 | 0.23 | 0.39 | 15500.00 | 10298  | ECA    | 1   | 4947  | 6309  |
| Bulgaria     | BGR | 1993 | 0.07 | 0.12 | 0.17 | 0.22 | 0.42 | 177.89   | 8356   | ECA    | 1   | 4763  | 5773  |
| Croatia      | HRV | 2001 | 0.08 | 0.13 | 0.17 | 0.23 | 0.40 | 5.43     | 4494   | ECA    | 1   | 6094  | 6927  |
| Slovenia     | SVN | 1998 | 0.09 | 0.13 | 0.17 | 0.22 | 0.38 | 135.36   | 1991   | ECA    | 1   | 13746 | 13918 |
| Ukraine      | UKR | 1999 | 0.09 | 0.13 | 0.17 | 0.23 | 0.38 | 1.83     | 51114  | ECA    | 1   | 3261  | 4311  |
| Moldova      | MDA | 1992 | 0.07 | 0.12 | 0.17 | 0.23 | 0.42 | 4.60     | 4325   | ECA    | 1   | 1599  | 2214  |
| Estonia      | EST | 1995 | 0.07 | 0.11 | 0.16 | 0.22 | 0.44 | 12.03    | 1469   | ECA    | 1   | 6856  | 7635  |
| Latvia       | LVA | 1998 | 0.08 | 0.13 | 0.17 | 0.22 | 0.40 | 0.55     | 2491   | ECA    | 1   | 5154  | 6209  |
| Lithuania    | LTU | 1993 | 0.08 | 0.12 | 0.16 | 0.21 | 0.42 | 4.00     | 3709   | ECA    | 1   | 5770  | 6638  |
| Albania      | ALB |      |      |      |      |      |      | 104.50   | 3266   | ECA    | 0   | 2639  | 2997  |
| Macedonia    | MKD | 1998 | 0.08 | 0.14 | 0.18 | 0.23 | 0.37 | 39.98    | 1980   | ECA    | 1   | 3833  | 4251  |
| Armenia      | ARM | 1998 | 0.07 | 0.11 | 0.15 | 0.22 | 0.45 | 414.04   | 3774   | ECA    | 1   | 1852  | 2411  |
| Azerbaijan   | AZE | 2001 | 0.07 | 0.12 | 0.15 | 0.21 | 0.45 | 4301.26  | 7763   | ECA    | 1   | 1755  | 2194  |
| Georgia      | GEO | 2000 | 0.06 | 0.11 | 0.16 | 0.22 | 0.45 | 1.26     | 5420   | ECA    | 1   | 3078  | 4197  |
| Kazakhstan   | KAZ | 1993 | 0.07 | 0.12 | 0.17 | 0.23 | 0.40 | 67.30    | 15921  | ECA    | 1   | 4557  | 5805  |
| Kyrgyz Rep.  | KGZ | 1993 | 0.07 | 0.12 | 0.16 | 0.23 | 0.42 | 12.81    | 4576   | ECA    | 1   | 1915  | 2453  |
| Mongolia     | MNG | 1998 | 0.06 | 0.10 | 0.14 | 0.19 | 0.51 | 548.40   | 2498   | ECA    | 1   | 1231  | 1301  |
| Tajikistan   | TJK | 1998 | 0.08 | 0.13 | 0.17 | 0.22 | 0.40 | 295.50   | 5927   | ECA    | 1   | 875   | 1215  |
| Turkmenistan | TKM | 1998 | 0.06 | 0.10 | 0.15 | 0.22 | 0.47 | 3978.23  | 4598   | ECA    | 1   | 3571  | 4397  |
| Uzbekistan   | UZB | 2000 | 0.09 | 0.14 | 0.18 | 0.23 | 0.36 | 41.10    | 23225  | ECA    | 1   | 2064  | 2813  |

Table A2: Country-level poverty estimates – 1996

| country           | ISO | <i>\$1/day poverty line</i> |           |                     |           | <i>\$2/day poverty line</i> |           |                     |           |
|-------------------|-----|-----------------------------|-----------|---------------------|-----------|-----------------------------|-----------|---------------------|-----------|
|                   |     | <i>GK real GDP</i>          |           | <i>EKS real GDP</i> |           | <i>GK real GDP</i>          |           | <i>EKS real GDP</i> |           |
|                   |     | rate(%)                     | no.(000s) | rate(%)             | no.(000s) | rate(%)                     | no.(000s) | rate(%)             | no.(000s) |
| Botswana          | BWA | 2.6                         | 39        | 4.2                 | 64        | 16.7                        | 250       | 19.0                | 285       |
| Cameroon          | CMR | 8.1                         | 1094      | 18.6                | 2521      | 33.2                        | 4499      | 46.3                | 6269      |
| Cote d'Ivoire     | CIV | 1.5                         | 204       | 6.4                 | 896       | 20.0                        | 2772      | 32.8                | 4556      |
| Egypt             | EGY | 0.0                         | 0         | 0.0                 | 0         | 0.7                         | 387       | 3.1                 | 1858      |
| Guinea            | GIN | 1.1                         | 71        | 7.4                 | 497       | 16.5                        | 1117      | 32.0                | 2162      |
| Kenya             | KEN | 23.0                        | 6429      | 30.8                | 8612      | 55.3                        | 15449     | 64.8                | 18103     |
| Madagascar        | MDG | 36.5                        | 5005      | 44.6                | 6123      | 67.8                        | 9306      | 74.0                | 10155     |
| Malawi            | MWI | 52.6                        | 5272      | 64.6                | 6468      | 76.5                        | 7666      | 80.5                | 8064      |
| Mali              | MLI | 45.8                        | 4572      | 57.9                | 5783      | 72.5                        | 7241      | 78.2                | 7813      |
| Mauritius         | MUS | 0.0                         | 0         | 0.0                 | 0         | 0.0                         | 0         | 0.0                 | 0         |
| Morocco           | MAR | 0.0                         | 0         | 0.0                 | 12        | 1.9                         | 518       | 5.0                 | 1339      |
| Nigeria           | NGA | 44.7                        | 51215     | 51.0                | 58395     | 71.9                        | 82318     | 76.6                | 87649     |
| Senegal           | SEN | 12.4                        | 1065      | 20.2                | 1730      | 41.6                        | 3563      | 52.2                | 4469      |
| Sierra Leone      | SLE | 47.7                        | 2208      | 57.9                | 2680      | 63.2                        | 2927      | 73.6                | 3408      |
| Swaziland         | SWZ | 1.5                         | 14        | 5.0                 | 46        | 16.7                        | 155       | 22.8                | 211       |
| Tanzania          | TZA | 64.9                        | 19773     | 68.2                | 20800     | 88.3                        | 26913     | 90.4                | 27546     |
| Tunisia           | TUN | 0.0                         | 0         | 0.0                 | 0         | 0.1                         | 11        | 1.1                 | 97        |
| Zambia            | ZMB | 46.5                        | 4285      | 50.8                | 4679      | 72.0                        | 6637      | 74.7                | 6880      |
| Zimbabwe          | ZWE | 1.0                         | 117       | 3.5                 | 389       | 15.9                        | 1788      | 25.1                | 2826      |
| Bangladesh        | BGD | 5.4                         | 6532      | 8.3                 | 10134     | 38.3                        | 46612     | 45.5                | 55394     |
| China             | CHN | 0.8                         | 9877      | 1.7                 | 20702     | 15.0                        | 182588    | 19.7                | 239023    |
| Hong Kong         | HKG | 0.0                         | 0         | 0.0                 | 0         | 0.0                         | 0         | 0.0                 | 0         |
| India             | IND | 1.1                         | 10541     | 2.6                 | 25047     | 19.4                        | 183341    | 27.8                | 262443    |
| Indonesia         | IDN | 0.0                         | 0         | 0.0                 | 47        | 1.3                         | 2625      | 4.3                 | 8518      |
| Iran              | IRN | 0.0                         | 7         | 0.1                 | 31        | 3.1                         | 1844      | 4.5                 | 2697      |
| Korea             | KOR | 0.0                         | 0         | 0.0                 | 0         | 0.0                         | 0         | 0.0                 | 0         |
| Nepal             | NPL | 9.5                         | 2077      | 22.7                | 4950      | 42.9                        | 9348      | 60.8                | 13250     |
| Pakistan          | PAK | 1.6                         | 2023      | 2.4                 | 3062      | 22.7                        | 28446     | 29.1                | 36518     |
| Philippines       | PHL | 1.0                         | 698       | 1.6                 | 1168      | 13.8                        | 9944      | 16.8                | 12049     |
| Singapore         | SGP | 0.0                         | 0         | 0.0                 | 0         | 0.0                         | 0         | 0.0                 | 0         |
| Sri Lanka         | LKA | 0.0                         | 8         | 0.1                 | 27        | 5.9                         | 1081      | 9.0                 | 1653      |
| Thailand          | THA | 0.0                         | 0         | 0.0                 | 0         | 0.1                         | 74        | 0.5                 | 295       |
| Vietnam           | VNM | 5.7                         | 4251      | 10.4                | 7692      | 37.8                        | 28059     | 46.8                | 34806     |
| Bahamas           | BHS | 0.0                         | 0         | 0.0                 | 0         | 0.0                         | 0         | 0.0                 | 0         |
| Jamaica           | JAM | 0.0                         | 0         | 0.2                 | 4         | 3.5                         | 88        | 7.8                 | 197       |
| St.Lucia          | LCA | 0.0                         | 0         | 0.1                 | 0         | 2.4                         | 4         | 5.1                 | 7         |
| Trinidad & Tobago | TTO | 0.0                         | 0         | 0.0                 | 0         | 0.0                         | 0         | 0.2                 | 3         |
| Bolivia           | BOL | 10.1                        | 767       | 12.4                | 941       | 27.7                        | 2100      | 30.5                | 2318      |
| Brazil            | BRA | 1.9                         | 3025      | 4.0                 | 6533      | 16.3                        | 26254     | 18.5                | 29946     |
| Chile             | CHL | 0.0                         | 5         | 0.1                 | 9         | 3.9                         | 560       | 5.7                 | 826       |
| Ecuador           | ECU | 1.2                         | 144       | 2.0                 | 234       | 14.8                        | 1737      | 19.3                | 2252      |
| Panama            | PAN | 0.1                         | 4         | 0.2                 | 6         | 7.3                         | 196       | 8.4                 | 226       |
| Peru              | PER | 0.4                         | 106       | 0.8                 | 197       | 10.3                        | 2475      | 12.7                | 3031      |
| Uruguay           | URY | 0.0                         | 0         | 0.0                 | 0         | 0.6                         | 20        | 1.4                 | 46        |
| Venezuela         | VEN | 0.4                         | 82        | 1.0                 | 222       | 8.4                         | 1876      | 13.0                | 2908      |
| Jordan            | JOR | 0.0                         | 1         | 0.4                 | 17        | 4.7                         | 205       | 13.1                | 564       |
| Yemen             | YEM | 34.1                        | 5359      | 54.7                | 8588      | 70.5                        | 11058     | 85.7                | 13447     |

Table A2: Country-level poverty estimates – 1996

| country      | ISO | \$1/day poverty line |           |              |           | \$2/day poverty line |           |              |           |
|--------------|-----|----------------------|-----------|--------------|-----------|----------------------|-----------|--------------|-----------|
|              |     | GK real GDP          |           | EKS real GDP |           | GK real GDP          |           | EKS real GDP |           |
|              |     | rate(%)              | no.(000s) | rate(%)      | no.(000s) | rate(%)              | no.(000s) | rate(%)      | no.(000s) |
| Austria      | AUT | 0.0                  | 0         | 0.0          | 0         | 0.0                  | 0         | 0.0          | 0         |
| Belgium      | BEL | 0.0                  | 0         | 0.0          | 0         | 0.0                  | 0         | 0.0          | 0         |
| Denmark      | DNK | 0.0                  | 0         | 0.0          | 0         | 0.0                  | 0         | 0.0          | 0         |
| France       | FRA | 0.0                  | 0         | 0.0          | 0         | 0.0                  | 0         | 0.0          | 0         |
| Finland      | FIN | 0.0                  | 0         | 0.0          | 0         | 0.0                  | 0         | 0.0          | 0         |
| Germany      | GER | 0.0                  | 0         | 0.0          | 0         | 0.0                  | 0         | 0.0          | 0         |
| Greece       | GRC | 0.0                  | 0         | 0.0          | 0         | 0.0                  | 0         | 0.0          | 0         |
| Ireland      | IRL | 0.0                  | 0         | 0.0          | 0         | 0.0                  | 0         | 0.0          | 0         |
| Italy        | ITA | 0.0                  | 0         | 0.0          | 0         | 0.0                  | 0         | 0.0          | 0         |
| Luxembourg   | LUX | 0.0                  | 0         | 0.0          | 0         | 0.0                  | 0         | 0.0          | 0         |
| Netherlands  | NLD | 0.0                  | 0         | 0.0          | 0         | 0.0                  | 0         | 0.0          | 0         |
| Portugal     | PRT | 0.0                  | 0         | 0.0          | 0         | 0.0                  | 0         | 0.0          | 0         |
| Spain        | ESP | 0.0                  | 0         | 0.0          | 0         | 0.0                  | 0         | 0.0          | 0         |
| Sweden       | SWE | 0.0                  | 0         | 0.0          | 0         | 0.0                  | 0         | 0.0          | 0         |
| UK           | GBR | 0.0                  | 0         | 0.0          | 0         | 0.0                  | 0         | 0.0          | 0         |
| Norway       | NOR | 0.0                  | 0         | 0.0          | 0         | 0.0                  | 0         | 0.0          | 0         |
| Poland       | POL | 0.0                  | 0         | 0.0          | 0         | 0.0                  | 0         | 0.0          | 4         |
| Switzerland  | CHE | 0.0                  | 0         | 0.0          | 0         | 0.0                  | 0         | 0.0          | 0         |
| Czech Rep    | CZE | 0.0                  | 0         | 0.0          | 0         | 0.0                  | 0         | 0.0          | 0         |
| Hungary      | HUN | 0.0                  | 0         | 0.0          | 0         | 0.0                  | 0         | 0.0          | 0         |
| Turkey       | TUR | 0.0                  | 0         | 0.0          | 0         | 0.6                  | 384       | 0.8          | 504       |
| Australia    | AUS | 0.0                  | 0         | 0.0          | 0         | 0.0                  | 0         | 0.0          | 0         |
| New Zealand  | NZL | 0.0                  | 0         | 0.0          | 0         | 0.0                  | 0         | 0.0          | 0         |
| Japan        | JPN | 0.0                  | 0         | 0.0          | 0         | 0.0                  | 0         | 0.0          | 0         |
| Canada       | CAN | 0.0                  | 0         | 0.0          | 0         | 0.0                  | 0         | 0.0          | 0         |
| Mexico       | MEX | 0.2                  | 158       | 0.3          | 240       | 7.7                  | 7128      | 8.9          | 8211      |
| USA          | USA | 0.0                  | 0         | 0.0          | 0         | 0.0                  | 0         | 0.0          | 0         |
| Israel       | ISR | 0.0                  | 0         | 0.0          | 0         | 0.0                  | 0         | 0.0          | 0         |
| Slovak Rep.  | SVK | 0.0                  | 0         | 0.0          | 0         | 0.0                  | 0         | 0.0          | 0         |
| Russian Fed  | RUS | 0.0                  | 0         | 0.0          | 0         | 1.0                  | 1416      | 2.0          | 2998      |
| Romania      | ROM | 0.0                  | 0         | 0.0          | 0         | 0.1                  | 14        | 0.3          | 57        |
| Belarus      | BLR | 0.0                  | 0         | 0.0          | 0         | 0.1                  | 14        | 0.8          | 77        |
| Bulgaria     | BGR | 0.0                  | 0         | 0.0          | 0         | 0.7                  | 56        | 2.1          | 177       |
| Croatia      | HRV | 0.0                  | 0         | 0.0          | 0         | 0.0                  | 2         | 0.1          | 6         |
| Slovenia     | SVN | 0.0                  | 0         | 0.0          | 0         | 0.0                  | 0         | 0.0          | 0         |
| Ukraine      | UKR | 0.0                  | 0         | 0.0          | 11        | 0.9                  | 454       | 4.2          | 2152      |
| Moldova      | MDA | 3.1                  | 134       | 9.9          | 429       | 22.3                 | 965       | 38.6         | 1669      |
| Estonia      | EST | 0.0                  | 0         | 0.0          | 0         | 0.1                  | 1         | 0.2          | 2         |
| Latvia       | LVA | 0.0                  | 0         | 0.0          | 0         | 0.1                  | 3         | 0.6          | 15        |
| Lithuania    | LTU | 0.0                  | 0         | 0.0          | 0         | 0.1                  | 2         | 0.3          | 10        |
| Macedonia    | MKD | 0.0                  | 0         | 0.0          | 0         | 1.7                  | 34        | 3.0          | 59        |
| Armenia      | ARM | 1.9                  | 70        | 6.6          | 249       | 22.4                 | 846       | 34.2         | 1292      |
| Azerbaijan   | AZE | 3.3                  | 255       | 7.3          | 563       | 24.5                 | 1902      | 34.6         | 2688      |
| Georgia      | GEO | 0.1                  | 6         | 1.3          | 70        | 6.8                  | 371       | 14.9         | 809       |
| Kazakhstan   | KAZ | 0.0                  | 0         | 0.0          | 0         | 0.7                  | 104       | 2.5          | 394       |
| Kyrgyz Rep.  | KGZ | 1.7                  | 79        | 5.1          | 234       | 19.5                 | 892       | 29.8         | 1364      |
| Mongolia     | MNG | 22.8                 | 570       | 26.6         | 665       | 57.6                 | 1438      | 61.8         | 1543      |
| Tajikistan   | TJK | 15.4                 | 911       | 31.1         | 1841      | 50.8                 | 3012      | 69.6         | 4127      |
| Turkmenistan | TKM | 0.1                  | 4         | 0.5          | 21        | 5.4                  | 250       | 10.9         | 500       |
| Uzbekistan   | UZB | 0.1                  | 29        | 1.3          | 295       | 6.8                  | 1572      | 17.9         | 4156      |



Table A3: Real income estimates and other data for poverty estimation – 2005

| country            | ISO | year | Q1    | Q2    | Q3    | Q4    | Q5    | XR      | pop     | region | pov | EKS   | GK    |
|--------------------|-----|------|-------|-------|-------|-------|-------|---------|---------|--------|-----|-------|-------|
| Hong Kong, China   | HKG | 1996 | 3.70  | 8.20  | 12.70 | 19.10 | 56.30 | 7.78    | 6810    | HIC    | 1   | 35257 | 35629 |
| Macao, China       | MAC |      |       |       |       |       |       | 8.01    | 470     | HIC    | 0   | 36547 | 37132 |
| Singapore          | SGP | 1998 | 5.04  | 9.42  | 14.55 | 22.02 | 48.97 | 1.66    | 4340    | HIC    | 1   | 39150 | 40568 |
| Taiwan, China      | TWN | 2003 | 6.72  | 12.37 | 16.91 | 23.17 | 40.85 | 32.17   | 22650   | HIC    | 1   | 27079 | 27982 |
| Brunei Darussalam  | BRN |      |       |       |       |       |       | 1.66    | 370     | EAP    | 0   | 46855 | 52112 |
| Bangladesh         | BGD | 2005 | 9.36  | 12.62 | 16.13 | 21.12 | 40.77 | 64.33   | 136990  | SA     | 1   | 1388  | 1493  |
| Bhutan             | BTN | 2003 | 5.36  | 8.68  | 12.99 | 19.96 | 53.01 | 44.1    | 630     | SA     | 1   | 3972  | 4568  |
| India              | IND | 2005 | 8.08  | 11.27 | 14.94 | 20.37 | 45.34 | 44.1    | 1101320 | SA     | 1   | 2276  | 2296  |
| Iran, Islamic Rep. | IRN | 2005 | 6.41  | 10.88 | 15.58 | 22.16 | 44.97 | 8963.96 | 68700   | MENA   | 1   | 11783 | 13165 |
| Maldives           | MDV |      |       |       |       |       |       | 12.8    | 290     | SA     | 0   | 4486  | 5126  |
| Nepal              | NPL | 2004 | 6.10  | 8.85  | 12.45 | 18.36 | 54.24 | 71.37   | 25340   | SA     | 1   | 1133  | 1212  |
| Pakistan           | PAK | 2005 | 9.07  | 12.77 | 16.33 | 21.32 | 40.51 | 59.51   | 153960  | SA     | 1   | 2608  | 2692  |
| Sri Lanka          | LKA | 2002 | 6.75  | 10.36 | 14.42 | 20.50 | 47.97 | 100.5   | 19670   | SA     | 1   | 3786  | 3883  |
| Mongolia           | MNG | 2005 | 7.22  | 12.27 | 16.97 | 23.06 | 40.48 | 1205.22 | 2550    | ECA    | 1   | 2835  | 3193  |
| Cambodia           | KHM | 2004 | 6.89  | 10.02 | 13.87 | 19.85 | 49.37 | 4092.5  | 13830   | EAP    | 1   | 1632  | 1890  |
| Fiji               | FJI |      |       |       |       |       |       | 1.69    | 840     | EAP    | 0   | 4672  | 4629  |
| Indonesia          | IDN | 2005 | 7.15  | 10.74 | 14.38 | 20.45 | 47.27 | 9704.74 | 218870  | EAP    | 1   | 3414  | 3598  |
| Lao PDR            | LAO | 2003 | 8.51  | 12.31 | 16.18 | 21.61 | 41.39 | 10655.2 | 5650    | EAP    | 1   | 2046  | 2383  |
| Malaysia           | MYS | 2004 | 6.35  | 10.76 | 15.78 | 22.75 | 44.36 | 3.79    | 26130   | EAP    | 1   | 11668 | 11694 |
| Philippines        | PHL | 2006 | 5.60  | 9.08  | 13.68 | 21.23 | 50.41 | 55.09   | 85260   | EAP    | 1   | 3197  | 3388  |
| China              | CHN | 2005 | 5.73  | 9.80  | 14.66 | 22.00 | 47.81 | 8.19    | 1303720 | EAP    | 1   | 4526  | 4789  |
| Thailand           | THA | 2004 | 6.07  | 9.75  | 14.22 | 20.97 | 48.99 | 40.22   | 64760   | EAP    | 1   | 7299  | 6916  |
| Vietnam            | VNM | 2006 | 7.07  | 10.82 | 15.15 | 21.60 | 45.36 | 15858.9 | 83120   | EAP    | 1   | 2413  | 2838  |
| Argentina          | ARG | 2005 | 3.52  | 7.87  | 12.92 | 20.97 | 54.71 | 2.9     | 37880   | LAC    | 1   | 10864 | 10898 |
| Bolivia            | BOL | 2004 | 4.62  | 8.17  | 12.09 | 18.38 | 56.75 | 8.07    | 9430    | LAC    | 1   | 3571  | 4218  |
| Brazil             | BRA | 2005 | 2.98  | 6.56  | 11.07 | 18.51 | 60.87 | 2.43    | 184180  | LAC    | 1   | 8067  | 8335  |
| Chile              | CHL | 2003 | 3.85  | 7.29  | 11.14 | 17.80 | 59.92 | 560.09  | 16280   | LAC    | 1   | 11391 | 11262 |
| Colombia           | COL | 2004 | 2.85  | 6.95  | 11.09 | 18.37 | 60.74 | 2320.75 | 41820   | LAC    | 1   | 6101  | 6373  |
| Ecuador            | ECU | 2005 | 3.35  | 7.38  | 11.88 | 19.31 | 58.07 | 1       | 13220   | LAC    | 1   | 6240  | 6270  |
| Peru               | PER | 2005 | 4.31  | 8.48  | 13.26 | 21.00 | 52.95 | 3.3     | 27220   | LAC    | 1   | 6111  | 6353  |
| Paraguay           | PRY | 2005 | 3.09  | 7.28  | 11.85 | 19.79 | 57.98 | 6177.96 | 5900    | LAC    | 1   | 3855  | 4075  |
| Uruguay            | URY | 2005 | 4.73  | 9.11  | 14.13 | 21.64 | 50.39 | 24.48   | 3310    | LAC    | 1   | 8865  | 8850  |
| Venezuela, RB      | VEN | 2005 | 3.70  | 8.88  | 13.96 | 21.53 | 51.94 | 2089.75 | 26580   | LAC    | 1   | 9501  | 9562  |
| Belgium            | BEL | 2000 | 8.48  | 13.00 | 16.33 | 20.87 | 41.32 | 0.8     | 10470   | HIC    | 1   | 31946 | 32072 |
| Denmark            | DNK | 2002 | 6.20  | 11.90 | 16.70 | 24.90 | 40.20 | 5.99    | 5420    | HIC    | 1   | 33512 | 33408 |
| Germany            | DEU | 2004 | 7.70  | 13.02 | 17.21 | 22.96 | 39.06 | 0.8     | 82460   | HIC    | 1   | 30603 | 30886 |
| Spain              | ESP | 2005 | 8.67  | 13.17 | 16.93 | 22.10 | 39.13 | 0.8     | 43400   | HIC    | 1   | 27295 | 26476 |
| France             | FRA | 2001 | 9.00  | 14.00 | 18.00 | 23.00 | 37.00 | 0.8     | 62820   | HIC    | 1   | 29675 | 29265 |
| Ireland            | IRL | 2000 | 7.45  | 12.30 | 16.41 | 21.83 | 42.01 | 0.8     | 4150    | HIC    | 1   | 36603 | 35354 |
| Italy              | ITA | 2002 | 6.40  | 11.40 | 16.60 | 23.30 | 42.30 | 0.8     | 58610   | HIC    | 1   | 27911 | 27645 |
| Luxembourg         | LUX | 2000 | 8.11  | 13.07 | 17.28 | 22.87 | 38.66 | 0.8     | 470     | HIC    | 1   | 68881 | 68690 |
| Netherlands        | NLD | 1999 | 7.66  | 13.21 | 17.26 | 23.23 | 38.65 | 0.8     | 16320   | HIC    | 1   | 33983 | 34401 |
| Austria            | AUT | 2000 | 8.56  | 13.31 | 17.47 | 22.90 | 37.76 | 0.8     | 8230    | HIC    | 1   | 34079 | 34106 |
| Portugal           | PRT | 2001 | 7.00  | 11.00 | 15.00 | 22.00 | 44.00 | 0.8     | 10550   | HIC    | 1   | 19887 | 19527 |
| Finland            | FIN | 2003 | 10.00 | 14.30 | 17.90 | 22.00 | 35.80 | 0.8     | 5250    | HIC    | 1   | 30268 | 29764 |
| Sweden             | SWE | 2003 | 10.10 | 14.40 | 17.80 | 22.20 | 35.50 | 7.46    | 9030    | HIC    | 1   | 32036 | 32598 |
| United Kingdom     | GBR | 2002 | 7.53  | 12.23 | 16.39 | 21.75 | 42.09 | 0.55    | 60220   | HIC    | 1   | 32254 | 31876 |
| Greece             | GRC | 2001 | 7.00  | 13.00 | 17.00 | 24.00 | 40.00 | 0.8     | 11080   | HIC    | 1   | 25501 | 24791 |
| Cyprus             | CYP |      |       |       |       |       |       | 0.46    | 760     | HIC    | 0   | 24566 | 24018 |
| Czech Republic     | CZE | 2003 | 10.71 | 14.61 | 18.25 | 23.09 | 33.34 | 23.95   | 10230   | ECA    | 1   | 20353 | 20624 |

Note: country - country name; ISO - ISO country code; year - year of quintile estimates; Q1-Q5 - share of income in each quintile;

XR - US exchange rate; pop - population in 1000s; region - region (SSA - Sub-Saharan Africa, EAP - East Asia & Pacific, ECA - Eastern Europe & Central Africa, LAC - Latin America & Caribbean, MENA - Middle East & North Africa, SA - South Asia, HIC - High-Income Countries); pov - whether poverty estimate (1=yes/2=no); EKS - EKS index; GK - GK index.

Table A3: Real income estimates and other data for poverty estimation – 2005

| country                  | ISO | year | Q1    | Q2    | Q3    | Q4    | Q5    | XR      | pop    | region | pov | EKS   | GK    |
|--------------------------|-----|------|-------|-------|-------|-------|-------|---------|--------|--------|-----|-------|-------|
| Estonia                  | EST | 2003 | 7.21  | 12.54 | 15.68 | 21.33 | 43.24 | 12.58   | 1350   | ECA    | 1   | 16689 | 16384 |
| Hungary                  | HUN | 2003 | 9.63  | 14.58 | 18.13 | 22.55 | 35.11 | 199.47  | 10090  | ECA    | 1   | 17023 | 16804 |
| Latvia                   | LVA | 2003 | 7.05  | 12.36 | 15.43 | 21.02 | 44.14 | 0.56    | 2300   | ECA    | 1   | 13336 | 13382 |
| Lithuania                | LTU | 2003 | 7.08  | 13.21 | 17.22 | 22.43 | 40.06 | 2.78    | 3410   | ECA    | 1   | 14363 | 14352 |
| Malta                    | MLT |      |       |       |       |       |       | 0.35    | 400    | HIC    | 0   | 20564 | 19868 |
| Poland                   | POL | 2003 | 6.53  | 11.98 | 16.62 | 22.83 | 42.03 | 3.24    | 38160  | ECA    | 1   | 14000 | 14327 |
| Slovak Republic          | SVK | 2003 | 10.03 | 14.31 | 17.60 | 22.18 | 35.88 | 31.04   | 5390   | ECA    | 1   | 16081 | 16260 |
| Slovenia                 | SVN | 2001 | 9.90  | 14.65 | 18.23 | 22.67 | 34.55 | 192.65  | 2000   | ECA    | 1   | 22851 | 22229 |
| Bulgaria                 | BGR | 2003 | 7.55  | 12.85 | 16.94 | 22.46 | 40.21 | 1.57    | 7720   | ECA    | 1   | 9086  | 9559  |
| Romania                  | ROM | 2005 | 8.22  | 12.77 | 16.84 | 22.25 | 39.92 | 2.91    | 21620  | ECA    | 1   | 8870  | 9079  |
| Turkey                   | TUR | 2005 | 5.18  | 9.77  | 14.62 | 21.62 | 48.81 | 1.35    | 72070  | ECA    | 1   | 7861  | 8124  |
| Iceland                  | ISL |      |       |       |       |       |       | 62.91   | 300    | HIC    | 0   | 37227 | 36617 |
| Norway                   | NOR | 2002 | 8.10  | 13.90 | 18.00 | 22.50 | 37.60 | 6.44    | 4620   | HIC    | 1   | 45997 | 45772 |
| Switzerland              | CHE | 2000 | 7.55  | 12.20 | 16.29 | 22.63 | 41.33 | 1.25    | 7500   | HIC    | 1   | 35626 | 36647 |
| Croatia                  | HRV | 2005 | 8.76  | 13.33 | 17.30 | 22.67 | 37.94 | 5.95    | 4440   | ECA    | 1   | 13076 | 13020 |
| Macedonia, FYR           | MKD | 2003 | 4.27  | 11.39 | 19.15 | 26.83 | 38.36 | 49.3    | 2030   | ECA    | 1   | 7122  | 7640  |
| Albania                  | ALB | 2004 | 8.23  | 12.62 | 17.04 | 22.61 | 39.51 | 100.78  | 3140   | ECA    | 1   | 5256  | 5187  |
| Bosnia and Herzegovina   | BIH | 2005 | 6.96  | 11.64 | 15.91 | 22.34 | 43.16 | 1.57    | 3840   | ECA    | 1   | 6037  | 6153  |
| Montenegro               | MNE |      |       |       |       |       |       | 0.8     | 620    | ECA    | 0   | 7387  | 8237  |
| Serbia                   | SRB | 2001 | 8.97  | 13.32 | 17.02 | 21.56 | 36.63 | 65.72   | 7440   | ECA    | 1   | 8497  | 8882  |
| Australia                | AUS | 2004 | 8.20  | 13.10 | 17.90 | 23.30 | 37.40 | 1.31    | 20470  | HIC    | 1   | 33241 | 32903 |
| New Zealand              | NZL | 1996 | 5.44  | 10.61 | 15.14 | 22.70 | 46.08 | 1.42    | 4100   | HIC    | 1   | 24888 | 24590 |
| Japan                    | JPN | 1993 | 10.60 | 14.20 | 17.60 | 22.00 | 35.70 | 110.22  | 127770 | HIC    | 1   | 29934 | 30831 |
| Korea, Rep.              | KOR | 1998 | 4.78  | 11.13 | 17.79 | 24.59 | 41.71 | 1024.12 | 48140  | HIC    | 1   | 21601 | 22252 |
| Canada                   | CAN | 2000 | 7.29  | 12.71 | 17.17 | 22.94 | 39.90 | 1.21    | 32300  | HIC    | 1   | 34884 | 34423 |
| Mexico                   | MEX | 2004 | 3.93  | 8.44  | 12.78 | 19.86 | 55.00 | 10.9    | 103830 | LAC    | 1   | 12002 | 11818 |
| United States            | USA | 2004 | 3.40  | 8.70  | 14.70 | 23.20 | 50.10 | 1       | 296970 | HIC    | 1   | 41675 | 41675 |
| Israel                   | ISR | 2001 | 6.28  | 10.92 | 16.23 | 23.07 | 43.49 | 4.49    | 6570   | HIC    | 1   | 23629 | 23484 |
| Russian Federation       | RUS | 2005 | 6.41  | 10.96 | 15.89 | 22.69 | 44.05 | 28.28   | 143110 | ECA    | 1   | 13056 | 13361 |
| Armenia                  | ARM | 2003 | 8.57  | 12.28 | 15.72 | 20.65 | 42.78 | 457.69  | 3220   | ECA    | 1   | 4617  | 5604  |
| Azerbaijan               | AZE | 2005 | 13.29 | 16.23 | 18.66 | 21.67 | 30.15 | 4727    | 8270   | ECA    | 1   | 5299  | 5575  |
| Belarus                  | BLR | 2005 | 8.80  | 13.57 | 17.82 | 23.12 | 36.69 | 2153.82 | 9780   | ECA    | 1   | 9885  | 10908 |
| Georgia                  | GEO | 2005 | 5.36  | 10.37 | 15.42 | 22.44 | 46.41 | 1.81    | 4360   | ECA    | 1   | 4215  | 4719  |
| Kazakhstan               | KAZ | 2003 | 7.36  | 11.85 | 16.58 | 22.96 | 41.25 | 132.88  | 15150  | ECA    | 1   | 9824  | 11107 |
| Kyrgyz Republic          | KGZ | 2004 | 8.11  | 11.98 | 16.24 | 22.31 | 41.36 | 41.01   | 5140   | ECA    | 1   | 2232  | 3126  |
| Moldova                  | MDA | 2004 | 7.30  | 11.61 | 15.96 | 21.99 | 43.14 | 12.6    | 3590   | ECA    | 1   | 2805  | 3622  |
| Tajikistan               | TJK | 2004 | 7.71  | 12.02 | 16.41 | 22.42 | 41.44 | 3.12    | 6850   | ECA    | 1   | 2047  | 3990  |
| Ukraine                  | UKR | 2005 | 8.97  | 13.40 | 17.57 | 22.90 | 37.16 | 5.12    | 47110  | ECA    | 1   | 6573  | 7479  |
| Angola                   | AGO | 2000 | 2.00  | 5.66  | 10.79 | 19.69 | 61.86 | 80.79   | 15560  | SSA    | 1   | 2865  | 3161  |
| Burundi                  | BDI | 2006 | 8.96  | 11.86 | 15.43 | 21.00 | 42.75 | 1081.58 | 7550   | SSA    | 1   | 422   | 507   |
| Benin                    | BEN | 2003 | 6.91  | 10.86 | 15.10 | 21.23 | 45.90 | 527.47  | 7530   | SSA    | 1   | 1363  | 1451  |
| Burkina Faso             | BFA | 2003 | 6.96  | 10.63 | 14.71 | 20.63 | 47.07 | 527.47  | 12800  | SSA    | 1   | 1133  | 1219  |
| Botswana                 | BWA | 1995 | 3.13  | 5.81  | 9.64  | 16.42 | 65.00 | 5.11    | 1700   | SSA    | 1   | 11954 | 14457 |
| Central African Republic | CAF | 2003 | 5.21  | 9.38  | 14.29 | 21.72 | 49.40 | 527.47  | 4000   | SSA    | 1   | 695   | 750   |
| Cote d'Ivoire            | CIV | 2002 | 5.00  | 8.71  | 12.86 | 19.32 | 54.11 | 527.47  | 19100  | SSA    | 1   | 1398  | 1549  |
| Cameroon                 | CMR | 2001 | 5.62  | 9.31  | 13.72 | 20.49 | 50.86 | 527.47  | 17530  | SSA    | 1   | 1996  | 2053  |
| Congo, Rep.              | COG | 2005 | 4.96  | 8.44  | 13.01 | 20.45 | 53.14 | 527.47  | 3320   | SSA    | 1   | 3106  | 3749  |
| Comoros                  | COM | 2004 | 2.55  | 5.35  | 8.94  | 15.14 | 68.02 | 393.38  | 610    | SSA    | 1   | 1145  | 1409  |
| Cape Verde               | CPV | 2001 | 4.54  | 7.91  | 12.27 | 19.38 | 55.90 | 88.65   | 480    | SSA    | 1   | 3127  | 3173  |
| Djibouti                 | DJI | 2002 | 6.03  | 10.51 | 15.21 | 21.78 | 46.47 | 177.72  | 750    | SSA    | 1   | 2025  | 2504  |

Table A3: Real income estimates and other data for poverty estimation – 2005

| country               | ISO | year | Q1   | Q2    | Q3    | Q4    | Q5    | XR      | pop    | region | pov | EKS   | GK    |
|-----------------------|-----|------|------|-------|-------|-------|-------|---------|--------|--------|-----|-------|-------|
| Egypt, Arab Rep.      | EGY | 2005 | 8.96 | 12.64 | 16.05 | 20.89 | 41.46 | 5.78    | 70000  | MENA   | 1   | 5046  | 5679  |
| Ethiopia              | ETH | 2005 | 9.28 | 13.22 | 16.78 | 21.36 | 39.36 | 8.67    | 72060  | SSA    | 1   | 516   | 561   |
| Gabon                 | GAB | 2005 | 6.07 | 10.13 | 14.64 | 21.23 | 47.93 | 527.47  | 1400   | SSA    | 1   | 11410 | 13325 |
| Ghana                 | GHA | 2006 | 5.24 | 9.84  | 14.73 | 21.64 | 48.55 | 9073.8  | 21340  | SSA    | 1   | 1254  | 1274  |
| Gambia, The           | GMB | 2003 | 4.79 | 8.56  | 13.24 | 20.57 | 52.84 | 28.58   | 1460   | SSA    | 1   | 697   | 995   |
| Guinea-Bissau         | GNB | 2002 | 7.23 | 11.64 | 16.03 | 22.10 | 43.00 | 527.47  | 1330   | SSA    | 1   | 600   | 732   |
| Equatorial Guinea     | GNQ |      |      |       |       |       |       | 527.47  | 1010   | SSA    | 0   | 10172 | 10420 |
| Guinea                | GIN | 2003 | 5.75 | 9.64  | 14.11 | 20.79 | 49.71 | 3644.33 | 9280   | SSA    | 1   | 1014  | 1123  |
| Kenya                 | KEN | 2005 | 4.70 | 8.77  | 13.32 | 20.25 | 52.96 | 75.55   | 35270  | SSA    | 1   | 1320  | 1397  |
| Liberia               | LBR | 2007 | 6.44 | 11.35 | 15.66 | 21.60 | 44.95 | 1       | 3230   | SSA    | 1   | 374   | 440   |
| Lesotho               | LSO | 2003 | 2.97 | 7.21  | 12.52 | 20.95 | 56.35 | 6.36    | 1870   | SSA    | 1   | 1523  | 1739  |
| Morocco               | MAR | 2007 | 6.52 | 10.45 | 14.54 | 20.61 | 47.88 | 8.87    | 30200  | MENA   | 1   | 3419  | 3462  |
| Madagascar            | MDG | 2005 | 6.15 | 9.57  | 13.06 | 17.73 | 53.49 | 2005.72 | 17050  | SSA    | 1   | 930   | 1064  |
| Mali                  | MLI | 2006 | 6.52 | 10.67 | 15.18 | 21.62 | 46.01 | 527.47  | 11730  | SSA    | 1   | 1097  | 1242  |
| Mozambique            | MOZ | 2003 | 5.43 | 9.20  | 13.06 | 19.02 | 53.29 | 23323   | 19420  | SSA    | 1   | 729   | 781   |
| Mauritania            | MRT | 2000 | 6.18 | 10.53 | 15.35 | 22.28 | 45.66 | 264.8   | 2840   | SSA    | 1   | 1609  | 1695  |
| Mauritius             | MUS |      |      |       |       |       |       | 29.5    | 1240   | SSA    | 0   | 9772  | 10858 |
| Malawi                | MWI | 2004 | 7.01 | 10.78 | 14.89 | 20.79 | 46.53 | 118.42  | 12400  | SSA    | 1   | 664   | 740   |
| Namibia               | NAM | 1993 |      |       |       |       |       | 6.36    | 2040   | SSA    | 0   | 4547  | 4914  |
| Niger                 | NER | 2004 | 5.85 | 9.78  | 13.91 | 20.14 | 50.32 | 527.47  | 12630  | SSA    | 1   | 599   | 607   |
| Nigeria               | NGA | 2004 | 5.13 | 9.67  | 14.68 | 21.91 | 48.61 | 131.27  | 130700 | SSA    | 1   | 2022  | 2094  |
| Rwanda                | RWA | 2000 | 5.26 | 9.05  | 13.29 | 19.83 | 52.57 | 557.81  | 8800   | SSA    | 1   | 811   | 992   |
| Sudan                 | SDN |      |      |       |       |       |       | 243.61  | 35400  | SSA    | 0   | 2216  | 2196  |
| Senegal               | SEN | 2001 | 6.22 | 10.61 | 15.32 | 21.97 | 45.88 | 527.47  | 10820  | SSA    | 1   | 1602  | 1610  |
| Sierra Leone          | SLE | 2003 | 6.09 | 9.65  | 14.04 | 20.93 | 49.29 | 2899.2  | 5100   | SSA    | 1   | 808   | 943   |
| Sao Tome and Principe | STP |      |      |       |       |       |       | 10558   | 150    | SSA    | 0   | 1578  | 1748  |
| Swaziland             | SWZ | 2001 | 4.45 | 7.95  | 12.34 | 19.36 | 55.90 | 6.36    | 1130   | SSA    | 1   | 4118  | 4703  |
| Chad                  | TCD | 2003 | 6.26 | 10.40 | 15.03 | 21.75 | 46.56 | 527.47  | 8520   | SSA    | 1   | 1904  | 2585  |
| Togo                  | TGO | 2006 | 7.62 | 11.74 | 16.09 | 22.15 | 42.40 | 527.47  | 5210   | SSA    | 1   | 912   | 951   |
| Tunisia               | TUN | 2000 | 5.93 | 10.19 | 14.94 | 21.79 | 47.15 | 1.3     | 10030  | MENA   | 1   | 6478  | 6822  |
| Tanzania              | TZA | 2001 | 6.90 | 11.40 | 15.60 | 22.00 | 44.20 | 1119.36 | 35300  | SSA    | 1   | 832   | 876   |
| Uganda                | UGA | 2005 | 6.08 | 9.78  | 14.12 | 20.69 | 49.33 | 1780.67 | 26490  | SSA    | 1   | 988   | 1159  |
| South Africa          | ZAF | 2000 | 3.06 | 5.60  | 9.88  | 18.81 | 62.65 | 6.36    | 46890  | SSA    | 1   | 8299  | 8361  |
| Congo, Dem. Rep.      | ZAR | 2006 | 5.47 | 9.20  | 13.79 | 20.94 | 50.60 | 473.91  | 59520  | SSA    | 1   | 270   | 298   |
| Zambia                | ZMB | 2004 | 3.63 | 7.76  | 12.81 | 20.62 | 55.18 | 4463.5  | 11440  | SSA    | 1   | 1193  | 1318  |
| Zimbabwe              | ZWE |      |      |       |       |       |       |         | 11530  | SSA    | 0   | 611   | 806   |
| Bahrain               | BHR |      |      |       |       |       |       | 0.38    | 740    | MENA   | 0   | 26993 | 30956 |
| Iraq                  | IRQ |      |      |       |       |       |       | 1473    | 27960  | MENA   | 0   | 3273  | 3742  |
| Jordan                | JOR | 2006 | 7.21 | 11.14 | 15.20 | 21.10 | 45.35 | 0.71    | 5470   | MENA   | 1   | 4580  | 4966  |
| Kuwait                | KWT |      |      |       |       |       |       | 0.29    | 2460   | MENA   | 0   | 46076 | 52475 |
| Lebanon               | LBN |      |      |       |       |       |       | 1507.5  | 3760   | MENA   | 0   | 11199 | 11507 |
| Oman                  | OMN |      |      |       |       |       |       | 0.38    | 2510   | MENA   | 0   | 21238 | 22951 |
| Qatar                 | QAT |      |      |       |       |       |       | 3.64    | 810    | MENA   | 0   | 76375 | 89450 |
| Saudi Arabia          | SAU |      |      |       |       |       |       | 3.75    | 23120  | MENA   | 0   | 21810 | 23786 |
| Syrian Arab Republic  | SYR |      |      |       |       |       |       | 52.14   | 18490  | MENA   | 0   | 4383  | 4747  |
| Yemen, Rep.           | YEM | 2005 | 7.18 | 11.31 | 15.27 | 20.95 | 45.29 | 191.42  | 20280  | MENA   | 1   | 2473  | 2830  |

Table A4: Country-level poverty estimates – 2005

| country            | ISO | <i>\$1/day poverty line</i> |           |                     |           | <i>\$2/day poverty line</i> |           |                     |           |
|--------------------|-----|-----------------------------|-----------|---------------------|-----------|-----------------------------|-----------|---------------------|-----------|
|                    |     | <i>GK real GDP</i>          |           | <i>EKS real GDP</i> |           | <i>GK real GDP</i>          |           | <i>EKS real GDP</i> |           |
|                    |     | rate(%)                     | no.(000s) | rate(%)             | no.(000s) | rate(%)                     | no.(000s) | rate(%)             | no.(000s) |
| Hong Kong, China   | HKG | 0.0                         | 0         | 0.0                 | 0         | 0.0                         | 0         | 0.0                 | 0         |
| Singapore          | SGP | 0.0                         | 0         | 0.0                 | 0         | 0.0                         | 0         | 0.0                 | 0         |
| Taiwan, China      | TWN | 0.0                         | 0         | 0.0                 | 0         | 0.0                         | 0         | 0.0                 | 0         |
| Bangladesh         | BGD | 12.7                        | 17449     | 16.0                | 21918     | 53.8                        | 73669     | 58.2                | 79688     |
| Bhutan             | BTN | 0.7                         | 5         | 2.0                 | 13        | 14.6                        | 92        | 19.6                | 123       |
| India              | IND | 4.0                         | 44027     | 4.0                 | 44027     | 33.3                        | 367001    | 33.3                | 367001    |
| Iran, Islamic Rep. | IRN | 0.0                         | 0         | 0.0                 | 0         | 0.0                         | 0         | 0.0                 | 7         |
| Nepal              | NPL | 41.5                        | 10521     | 46.1                | 11691     | 72.4                        | 18356     | 74.7                | 18930     |
| Pakistan           | PAK | 0.9                         | 1459      | 1.2                 | 1832      | 18.8                        | 28928     | 20.7                | 31809     |
| Sri Lanka          | LKA | 0.6                         | 116       | 0.6                 | 116       | 12.4                        | 2433      | 13.9                | 2730      |
| Mongolia           | MNG | 1.0                         | 27        | 2.4                 | 62        | 15.8                        | 402       | 20.2                | 514       |
| Cambodia           | KHM | 14.9                        | 2059      | 20.4                | 2817      | 48.9                        | 6766      | 57.5                | 7957      |
| Indonesia          | IDN | 0.6                         | 1243      | 0.7                 | 1631      | 13.6                        | 29768     | 16.9                | 37003     |
| Lao PDR            | LAO | 2.3                         | 132       | 4.8                 | 270       | 26.8                        | 1516      | 35.5                | 2005      |
| Malaysia           | MYS | 0.0                         | 0         | 0.0                 | 0         | 0.0                         | 3         | 0.0                 | 3         |
| Philippines        | PHL | 3.6                         | 3058      | 4.3                 | 3691      | 23.7                        | 20236     | 27.4                | 23382     |
| China              | CHN | 0.4                         | 4585      | 0.5                 | 6246      | 9.9                         | 128985    | 12.5                | 162633    |
| Thailand           | THA | 0.0                         | 0         | 0.0                 | 0         | 1.8                         | 1140      | 1.4                 | 901       |
| Vietnam            | VNM | 2.3                         | 1932      | 5.7                 | 4777      | 24.8                        | 20645     | 32.8                | 27291     |
| Argentina          | ARG | 0.0                         | 0         | 0.0                 | 0         | 2.6                         | 1002      | 2.6                 | 1002      |
| Bolivia            | BOL | 2.9                         | 273       | 5.2                 | 492       | 21.9                        | 2069      | 27.3                | 2579      |
| Brazil             | BRA | 0.8                         | 1457      | 0.8                 | 1457      | 11.8                        | 21644     | 13.1                | 24043     |
| Chile              | CHL | 0.0                         | 0         | 0.0                 | 0         | 1.6                         | 266       | 1.6                 | 266       |
| Colombia           | COL | 4.0                         | 1670      | 4.9                 | 2042      | 18.8                        | 7849      | 19.9                | 8305      |
| Ecuador            | ECU | 1.7                         | 229       | 1.7                 | 229       | 15.9                        | 2101      | 15.9                | 2101      |
| Peru               | PER | 0.4                         | 118       | 0.4                 | 118       | 9.3                         | 2519      | 10.5                | 2847      |
| Paraguay           | PRY | 11.2                        | 658       | 12.4                | 731       | 28.3                        | 1670      | 29.9                | 1762      |
| Uruguay            | URY | 0.0                         | 0         | 0.0                 | 0         | 2.1                         | 69        | 2.1                 | 69        |
| Venezuela, RB      | VEN | 0.0                         | 8         | 0.0                 | 8         | 3.8                         | 1006      | 4.6                 | 1216      |
| Belgium            | BEL | 0.0                         | 0         | 0.0                 | 0         | 0.0                         | 0         | 0.0                 | 0         |
| Denmark            | DNK | 0.0                         | 0         | 0.0                 | 0         | 0.0                         | 0         | 0.0                 | 0         |
| Germany            | DEU | 0.0                         | 0         | 0.0                 | 0         | 0.0                         | 0         | 0.0                 | 0         |
| Spain              | ESP | 0.0                         | 0         | 0.0                 | 0         | 0.0                         | 0         | 0.0                 | 0         |
| France             | FRA | 0.0                         | 0         | 0.0                 | 0         | 0.0                         | 0         | 0.0                 | 0         |
| Ireland            | IRL | 0.0                         | 0         | 0.0                 | 0         | 0.0                         | 0         | 0.0                 | 0         |
| Italy              | ITA | 0.0                         | 0         | 0.0                 | 0         | 0.0                         | 0         | 0.0                 | 0         |
| Luxembourg         | LUX | 0.0                         | 0         | 0.0                 | 0         | 0.0                         | 0         | 0.0                 | 0         |
| Netherlands        | NLD | 0.0                         | 0         | 0.0                 | 0         | 0.0                         | 0         | 0.0                 | 0         |
| Austria            | AUT | 0.0                         | 0         | 0.0                 | 0         | 0.0                         | 0         | 0.0                 | 0         |

Table A4: Country-level poverty estimates – 2005

| country                     | ISO | <i>\$1/day poverty line</i> |           |                     |           | <i>\$2/day poverty line</i> |           |                     |           |
|-----------------------------|-----|-----------------------------|-----------|---------------------|-----------|-----------------------------|-----------|---------------------|-----------|
|                             |     | <i>GK real GDP</i>          |           | <i>EKS real GDP</i> |           | <i>GK real GDP</i>          |           | <i>EKS real GDP</i> |           |
|                             |     | rate(%)                     | no.(000s) | rate(%)             | no.(000s) | rate(%)                     | no.(000s) | rate(%)             | no.(000s) |
| Portugal                    | PRT | 0.0                         | 0         | 0.0                 | 0         | 0.0                         | 0         | 0.0                 | 0         |
| Finland                     | FIN | 0.0                         | 0         | 0.0                 | 0         | 0.0                         | 0         | 0.0                 | 0         |
| Sweden                      | SWE | 0.0                         | 0         | 0.0                 | 0         | 0.0                         | 0         | 0.0                 | 0         |
| United Kingdom              | GBR | 0.0                         | 0         | 0.0                 | 0         | 0.0                         | 0         | 0.0                 | 0         |
| Greece                      | GRC | 0.0                         | 0         | 0.0                 | 0         | 0.0                         | 0         | 0.0                 | 0         |
| Czech Republic              | CZE | 0.0                         | 0         | 0.0                 | 0         | 0.0                         | 0         | 0.0                 | 0         |
| Estonia                     | EST | 0.0                         | 0         | 0.0                 | 0         | 0.0                         | 0         | 0.0                 | 0         |
| Hungary                     | HUN | 0.0                         | 0         | 0.0                 | 0         | 0.0                         | 0         | 0.0                 | 0         |
| Latvia                      | LVA | 0.0                         | 0         | 0.0                 | 0         | 0.0                         | 0         | 0.0                 | 0         |
| Lithuania                   | LTU | 0.0                         | 0         | 0.0                 | 0         | 0.0                         | 0         | 0.0                 | 0         |
| Poland                      | POL | 0.0                         | 0         | 0.0                 | 0         | 0.0                         | 0         | 0.0                 | 0         |
| Slovak Republic             | SVK | 0.0                         | 0         | 0.0                 | 0         | 0.0                         | 0         | 0.0                 | 0         |
| Slovenia                    | SVN | 0.0                         | 0         | 0.0                 | 0         | 0.0                         | 0         | 0.0                 | 0         |
| Bulgaria                    | BGR | 0.0                         | 0         | 0.0                 | 0         | 0.0                         | 2         | 0.0                 | 3         |
| Romania                     | ROM | 0.0                         | 0         | 0.0                 | 0         | 0.0                         | 2         | 0.0                 | 5         |
| Turkey                      | TUR | 0.0                         | 0         | 0.0                 | 0         | 1.9                         | 1376      | 2.4                 | 1715      |
| Norway                      | NOR | 0.0                         | 0         | 0.0                 | 0         | 0.0                         | 0         | 0.0                 | 0         |
| Switzerland                 | CHE | 0.0                         | 0         | 0.0                 | 0         | 0.0                         | 0         | 0.0                 | 0         |
| Croatia                     | HRV | 0.0                         | 0         | 0.0                 | 0         | 0.0                         | 0         | 0.0                 | 0         |
| Macedonia, FYR              | MKD | 0.1                         | 2         | 0.2                 | 4         | 5.6                         | 114       | 7.4                 | 150       |
| Albania                     | ALB | 0.0                         | 0         | 0.0                 | 0         | 1.8                         | 57        | 1.8                 | 57        |
| Bosnia and Herze-<br>govina | BIH | 0.0                         | 0         | 0.0                 | 0         | 1.8                         | 68        | 1.8                 | 68        |
| Serbia                      | SRB | 0.0                         | 0         | 0.0                 | 0         | 0.0                         | 0         | 0.0                 | 0         |
| Australia                   | AUS | 0.0                         | 0         | 0.0                 | 0         | 0.0                         | 0         | 0.0                 | 0         |
| New Zealand                 | NZL | 0.0                         | 0         | 0.0                 | 0         | 0.0                         | 0         | 0.0                 | 0         |
| Japan                       | JPN | 0.0                         | 0         | 0.0                 | 0         | 0.0                         | 0         | 0.0                 | 0         |
| Korea, Rep.                 | KOR | 0.0                         | 0         | 0.0                 | 0         | 0.0                         | 0         | 0.0                 | 0         |
| Canada                      | CAN | 0.0                         | 0         | 0.0                 | 0         | 0.0                         | 0         | 0.0                 | 0         |
| Mexico                      | MEX | 0.0                         | 0         | 0.0                 | 0         | 1.2                         | 1205      | 0.9                 | 904       |
| United States               | USA | 0.0                         | 0         | 0.0                 | 0         | 0.0                         | 0         | 0.0                 | 0         |
| Israel                      | ISR | 0.0                         | 0         | 0.0                 | 0         | 0.0                         | 0         | 0.0                 | 0         |
| Russian Federation          | RUS | 0.0                         | 0         | 0.0                 | 0         | 0.0                         | 0         | 0.0                 | 0         |
| Armenia                     | ARM | 0.0                         | 0         | 0.0                 | 0         | 1.0                         | 33        | 2.9                 | 95        |
| Azerbaijan                  | AZE | 0.0                         | 0         | 0.0                 | 0         | 0.0                         | 1         | 0.0                 | 3         |
| Belarus                     | BLR | 0.0                         | 0         | 0.0                 | 0         | 0.0                         | 0         | 0.0                 | 0         |
| Georgia                     | GEO | 0.7                         | 28        | 1.4                 | 62        | 11.9                        | 518       | 15.6                | 681       |
| Kazakhstan                  | KAZ | 0.0                         | 0         | 0.0                 | 0         | 0.0                         | 0         | 0.0                 | 4         |
| Kyrgyz Republic             | KGZ | 0.6                         | 32        | 4.1                 | 213       | 15.6                        | 803       | 32.5                | 1671      |
| Moldova                     | MDA | 0.5                         | 19        | 2.1                 | 77        | 11.7                        | 420       | 22.6                | 812       |
| Tajikistan                  | TJK | 0.1                         | 10        | 7.6                 | 521       | 7.6                         | 521       | 37.4                | 2560      |

Table A4: Country-level poverty estimates – 2005

| country                       | ISO | <i>\$1/day poverty line</i> |           |                     |           | <i>\$2/day poverty line</i> |           |                     |           |
|-------------------------------|-----|-----------------------------|-----------|---------------------|-----------|-----------------------------|-----------|---------------------|-----------|
|                               |     | <i>GK real GDP</i>          |           | <i>EKS real GDP</i> |           | <i>GK real GDP</i>          |           | <i>EKS real GDP</i> |           |
|                               |     | rate(%)                     | no.(000s) | rate(%)             | no.(000s) | rate(%)                     | no.(000s) | rate(%)             | no.(000s) |
| Ukraine                       | UKR | 0.0                         | 0         | 0.0                 | 0         | 0.1                         | 29        | 0.2                 | 112       |
| Angola                        | AGO | 24.1                        | 3753      | 25.3                | 3931      | 42.3                        | 6588      | 45.8                | 7131      |
| Burundi                       | BDI | 74.9                        | 5659      | 81.1                | 6120      | 94.6                        | 7142      | 97.5                | 7361      |
| Benin                         | BEN | 24.7                        | 1856      | 26.6                | 2001      | 60.2                        | 4533      | 62.1                | 4679      |
| Burkina Faso                  | BFA | 34.3                        | 4387      | 36.5                | 4666      | 69.2                        | 8853      | 70.7                | 9048      |
| Botswana                      | BWA | 0.0                         | 0         | 0.0                 | 0         | 1.1                         | 19        | 3.2                 | 55        |
| Central African Re-<br>public | CAF | 59.1                        | 2363      | 62.8                | 2510      | 81.7                        | 3267      | 83.8                | 3352      |
| Cote d'Ivoire                 | CIV | 31.8                        | 6081      | 35.8                | 6845      | 62.9                        | 12005     | 66.4                | 12688     |
| Cameroon                      | CMR | 16.6                        | 2908      | 18.2                | 3193      | 47.2                        | 8281      | 47.2                | 8281      |
| Congo, Rep.                   | COG | 3.3                         | 109       | 6.7                 | 224       | 24.6                        | 815       | 31.9                | 1059      |
| Comoros                       | COM | 52.2                        | 318       | 60.3                | 368       | 74.8                        | 456       | 77.5                | 473       |
| Cape Verde                    | CPV | 8.5                         | 41        | 9.8                 | 47        | 33.0                        | 159       | 33.0                | 159       |
| Djibouti                      | DJI | 8.2                         | 61        | 14.4                | 108       | 32.4                        | 243       | 42.3                | 317       |
| Egypt, Arab Rep.              | EGY | 0.0                         | 0         | 0.0                 | 0         | 0.6                         | 418       | 1.5                 | 1067      |
| Ethiopia                      | ETH | 69.5                        | 50103     | 73.0                | 52587     | 93.5                        | 67384     | 95.7                | 68933     |
| Gabon                         | GAB | 0.0                         | 0         | 0.0                 | 0         | 0.0                         | 0         | 0.0                 | 1         |
| Ghana                         | GHA | 33.9                        | 7238      | 35.8                | 7636      | 65.6                        | 13990     | 65.6                | 13990     |
| Gambia, The                   | GMB | 50.0                        | 730       | 65.2                | 951       | 75.1                        | 1096      | 82.5                | 1205      |
| Guinea-Bissau                 | GNB | 57.1                        | 759       | 66.7                | 888       | 84.0                        | 1118      | 89.7                | 1193      |
| Guinea                        | GIN | 41.9                        | 3885      | 46.1                | 4274      | 72.0                        | 6680      | 74.6                | 6919      |
| Kenya                         | KEN | 35.2                        | 12418     | 37.1                | 13099     | 65.1                        | 22959     | 66.8                | 23565     |
| Liberia                       | LBR | 78.5                        | 2534      | 83.2                | 2689      | 96.0                        | 3100      | 98.1                | 3169      |
| Lesotho                       | LSO | 33.4                        | 625       | 36.8                | 688       | 57.2                        | 1069      | 62.7                | 1173      |
| Morocco                       | MAR | 1.3                         | 393       | 1.3                 | 393       | 18.4                        | 5544      | 18.4                | 5544      |
| Madagascar                    | MDG | 46.4                        | 7917      | 53.6                | 9146      | 75.9                        | 12946     | 78.4                | 13361     |
| Mali                          | MLI | 31.6                        | 3712      | 37.7                | 4419      | 66.0                        | 7745      | 70.9                | 8319      |
| Mozambique                    | MOZ | 62.2                        | 12081     | 65.9                | 12802     | 81.2                        | 15775     | 82.0                | 15919     |
| Mauritania                    | MRT | 20.2                        | 574       | 21.8                | 620       | 50.3                        | 1430      | 54.4                | 1545      |
| Malawi                        | MWI | 59.7                        | 7398      | 65.3                | 8101      | 83.3                        | 10324     | 86.3                | 10701     |
| Niger                         | NER | 70.4                        | 8889      | 70.4                | 8889      | 86.8                        | 10968     | 86.8                | 10968     |
| Nigeria                       | NGA | 16.7                        | 21792     | 18.1                | 23601     | 43.4                        | 56780     | 45.4                | 59396     |
| Rwanda                        | RWA | 49.8                        | 4383      | 60.1                | 5290      | 76.5                        | 6728      | 80.0                | 7037      |
| Senegal                       | SEN | 21.8                        | 2364      | 21.8                | 2364      | 52.8                        | 5717      | 54.9                | 5939      |
| Sierra Leone                  | SLE | 49.5                        | 2523      | 57.5                | 2935      | 76.1                        | 3883      | 80.2                | 4092      |
| Swaziland                     | SWZ | 1.8                         | 21        | 3.6                 | 41        | 18.5                        | 209       | 23.5                | 265       |
| Chad                          | TCD | 6.1                         | 522       | 14.6                | 1246      | 31.7                        | 2701      | 45.9                | 3907      |
| Togo                          | TGO | 40.7                        | 2122      | 45.1                | 2348      | 75.4                        | 3926      | 76.8                | 4000      |
| Tunisia                       | TUN | 0.0                         | 0         | 0.0                 | 0         | 2.1                         | 214       | 3.2                 | 321       |
| Tanzania                      | TZA | 49.0                        | 17300     | 51.2                | 18059     | 78.9                        | 27837     | 80.1                | 28279     |
| Uganda                        | UGA | 38.7                        | 10247     | 47.2                | 12491     | 71.3                        | 18893     | 75.2                | 19909     |
| South Africa                  | ZAF | 0.6                         | 266       | 0.6                 | 266       | 12.6                        | 5913      | 12.6                | 5913      |
| Congo, Dem. Rep.              | ZAR | 87.3                        | 51977     | 89.4                | 53220     | 98.8                        | 58831     | 99.5                | 59220     |
| Zambia                        | ZMB | 40.7                        | 4656      | 44.5                | 5090      | 67.1                        | 7674      | 70.2                | 8034      |
| Jordan                        | JOR | 0.0                         | 1         | 0.1                 | 4         | 4.0                         | 220       | 5.6                 | 308       |
| Yemen, Rep.                   | YEM | 2.3                         | 459       | 4.7                 | 961       | 24.1                        | 4889      | 30.1                | 6096      |
